# Supplementary material for: Correlates of Willingness to Participate in Vaccine Trials during Outbreaks: Evidence from University Students in Western Uganda
Source: Research Square preprint supplement (doi:10.21203/rs.3.rs-8580581/v1), 2026-01-29
Supplement: Supplementary file 1 [file 98de9dfe02c1c227adc718ee.xlsx]

## Sheet: Responses
age	sex	religion	gcondition	class	program	field	q9	q10	q11	q12	q13	q14	q15	q16	q17	q18	q19	q20	q21	q22	q23	q24	q25	q26	q27	q28	q29	q30
25	1	1	1	2	0	0	1	1	1	1	1	0	1	1	1		1	1	1	1	1	1	0	1	1	1	0	1
22	1	1	0	1	0	0	0	1	1	1	0	1	1	1	0	I was unable to access the vaccine	1	1	1	1	1	1	1	1	1	1	1	1
25	1	2	1	2	0	0	1	1	0	0	0	1	1	1	1		1	1	1	0	1	0	0	1	1	0	0	0
23	1	1	1	2	0	0	1	1	0	1	1	1	1	0	1		1	1	1	0	1	1	1	1	1	1	1	1
40	1	1	1	2	0	0	1	1	0	0	0	1	1	1	1		1	1	1	1	1	1	0	0	1	1	0	1
22	0	1	0	3	0	0	1	1	1	1	0	1	1	1	1		1	1	1	1	1	1	0	1	1	0	1	1
24	1	3	0	1	0	0	1	1	1	1	1	1	1	1	1		0	1	1	0	0	1	1	1	1	1	1	0
23	1	1	1	0	0	0	0	1	0	0	0	1	0	1	1		1	0	1	0	1	1	1	1	1	0	1	1
23	0	1	1	3	0	0	0	1	0	0	1	1	1	1	1		1	1	1	1	1	1	1	1	0	1	1	0
22	1	1	1	0	0	0	0	1	0	0	0	0	1	1	0	I feared	1	1	1	0	0	0	1	1	1	1	0	1
35	0	1	1	0	0	0	0	0	0	0	0	1	0	1	1		1	1	1	0	0	1	0	1	1	0	1	1
23	1	1	1	2	0	0	1	1	0	0	0	1	1	1	1		1	1	1	1	1	0	0	1	1	1	1	1
24	1	1	1	3	0	0	1	1	1	1	0	1	1	1	1		1	1	1	1	1	1	0	1	1	1	1	1
24	1	1	1	3	0	0	1	1	0	0	0	1	0	1	1		1	1	0	1	1	1	0	1	1	0	1	1
24	1	1	1	2	0	0	1	1	0	0	0	0	0	1	1		1	1	1	1	1	0	0	1	1	0	0	1
24	1	1	1	2	0	0	1	1	0	0	0	1	0	0	1		1	1	1	1	1	0	0	1	1	0	0	0
36	0	1	1	0	0	0	0	0	0	0	0	1	0	0	0	I did not want the vaccine	1	1	1	0	1	0	0	0	1	0	0	1
23	1	1	1	3	0	0	1	1	1	0	0	1	1	1	1		1	1	1	1	1	1	1	1	1	0	0	0
34	0	1	1	2	0	0	0	1	1	0	0	0	0	1	1		1	1	0	0	1	1	0	1	1	0	0	1
45	0	1	1	2	0	0	1	1	1	1	0	1	1	1	1		1	1	1	1	1	1	0	1	1	0	1	0
25	1	2	0	2	0	1	0	1	0	1	1	1	0	1	1		1	1	1	0	1	0	0	1	1	1	0	1
24	1	1	1	2	0	1	1	1	0	1	0	1	0	0	1		1	1	1	1	1	1	0	1	1	1	0	0
23	1	1	1	2	0	0	1	1	0	0	0	1	0	0	1		0	1	1	0	1	1	1	1	1	1	1	0
29	0	1	1	2	0	0	1	1	1	0	1	1	1	1	1		1	1	1	0	1	0	1	1	1	1	0	1
34	0	1	1	2	0	0	1	1	0	0	0	0	0	1	1		1	1	1	0	1	1	0	1	1	1	0	0
35	0	2	1	2	0	0	0	1	0	0	0	0	0	1	1		1	1	1	1	1	0	0	1	1	1	0	1
22	0	1	1	0	1	2	1	1	1	1	0	0	1	0	0	I feared	1	1	1	1	1	1	1	1	1	1	1	1
33	0	1	1	2	0	0	0	1	1	1	0	1	1	1	1		1	1	1	0	1	1	1	1	1	1	1	1
24	1	1	1	3	0	0	1	0	0	0	0	1	1	1	0	I was unable to access the vaccine	1	1	1	0	1	0	0	0	1	1	0	1
38	0	1	1	2	0	0	1	1	0	1	0	0	1	1	1		1	1	1	1	1	1	1	1	1	1	1	0
31	0	1	1	2	0	0	1	1	0	0	0	0	1	1	0	I feared	1	1	1	1	1	1	1	1	1	1	1	1
40	0	1	0	2	1	0		1	0	1	1	1	1	1	1		1	1	1	0	1	0	0	0	0	0	0	0
35	0	1	0	2	0	0	0	1	1	1	0	0	0	1	1		1	1	0	0	1	0	0	0	1	0	0	1
40	0	1	1	2	0	0	0	0	0	0	0	0	1	0	0	I feared	0	1	1	1	1	0	0	0	1	1	0	1
38	0	1	1	2	0	0	0	1	0	0	0	0	1	1	0	I did not want the vaccine	1	1	1	0	1	0	0	1	1	0	0	1
38	1	1	1	1	0	2	1	1	1	1	1	1	0	0	1		1	1	1	0	1	1	0	1	1	1	1	1
35	0	1	1	2	0	0	1	1	0	0	0	0	0	1	0	I did not want the vaccine	0	1	1	0	1	0	0	0	1	0	0	0
20	1	2	1	1	0	2	0	0	0	0	0	1	0	0	0	I was unable to access the vaccine	0	1	1	0	1	0	0	1	1	0	0	0
30	1	2	1	1	0	2	1	1	0	0	1	0	0	1	1		1	1	1	0	1	1	0	1	1	1	0	0
35	0	1	1	2	0	0	1	1	1	1	0	1	0	1	1		1	1	1	1	1	0	0	1	1	1	1	1
33	0	1	1	2	0	0	0	0	1	0	0	0	0	0	0	I feared	0	0	1	1	1	0	1	0	1	1	0	0
33	0	1	1	0	0	0	1	1	0	1	1	1	0	1	0	I feared	0	0	1	1	1	0	0	1	1	0	0	0
22	0	0	0	2	0	2	0	0	0	0	0	1	0	0	0	I did not want the vaccine	0	1	0	0	0	0	1	0	1	0	0	0
24	1	1	0	0	0	2	1	0	0	0	0	1	0	1	1		1	1	1	0	1	0	0	0	0	1	0	1
24	0	1	1	0	0	2	1	1	1	1	0	1	1	1	1		1	0	1	1	1	1	0	1	1	1	1	0
22	1	1	1	0	0	2	1	1	1	1	0	1	1	1	0	I was unable to access the vaccine	1	1	1	1	1	1	1	1	1	1	1	1
22	1	1	1	1	0	2	1	1	1	1	1	1	1	1	1		1	1	1	1	1	1	1	1	1	1	1	1
34	0	2	1	2	0	0	1	1	0	0	1	0	0	1	0	My family/ friends discouraged me	0	1	1	1	1	0	0	0	1	0	0	0
37	0	1	1	0	0	0	1	1	1	0	0	1	1	1	1		1	1	1	0	1	1	1	1	1	0	1	1
21	0	2	1	1	0	1	1	1	1	1	0	1	1	1	1		1	1	1	1	1	1	0	1	1	1	1	1
22	0	2	1	0	1	2	1	1	0	0	0	0	1	0	1		0	0	0	1	1	0	0	0	0	1	0	0
25	0	2	1	1	1	2	0	1	1	1	1	1	1	1	0	I feared	1	1	1	1	1	1	1	1	1	1	1	1
21	0	1	1	1	0	0	0	1	0	0	0	0	0	1	0	I did not want the vaccine	1	1	1	0	0	0	0	1	0	1	0	0
20	0	1	1	1	0	0	1	1	1	0	1	0	0	1	1		1	1	1	0	1	1	1	1	0	0	1	1
21	1	1	1	1	0	0	1	1	0	0	0	1	1	1	1		0	1	1	1	0	1	1	1	0	1	1	1
20	0	2	1	1	0	0	0	0	0	0	0	0	0	0	1		0	1	1	1	0	1	1	1	1	1	0	0
22	1	1	1	1	0	0	0	1	1	1	0	1	1	0	1		1	1	1	1	1	0	0	1	1	0	0	1
22	1	1	1	1	0	0	0	1	1	1	0	1	1	0	1		1	1	1	1	1	1	0	1	1	0	1	1
42	0	2	1	2	0	0	1	1	0	0	0	1	0	1	0	I feared	1	1	1	0	1	0	1	0	1	1	0	0
24	1	1	1	3	0	0	1	1	0	0	0	1	1	1	1		1	1	1	1	1	1	1	1	1	1	1	1
23	1	1	1	1	0	0	1	1	1	1	0	1	1	1	1		1	1	1	1	1	1	1	1	1	1	1	1
25	0	2	1	0	0	1	1	1	1	1	0	1	1	1	1		1	1	1	0	1	1	1	1	1	1	0	1
21	1	2	1	0	0	2	0	1	1	1	0	0	1	0	1		1	1	1	0	1	1	0	1	1	0	1	1
21	1	2	1	1	0	3	0	0	0	0	0	0	0	0	1		1	1	0	0	1	0	0	0			0	0
24	1	0	1	2	0	2	0	1	0	0	0	0	0	1	1		1	1	1	0	1	0	0	1	0	0	0	0
25	0	1	0	2	0	2	0	1	0	0	0	0	0	1	1		0	1	1	0	0	0	0	0	1	0	0	0
25	1	1	1	2	0	2	0	1	1	1	1	1	1	1	1		1	1	1	1	1	1	1		1	1	1	1
22	1	1	1	2	0	0	1	1	1	1	1	1	1	1	1		1	1	1	1	1	1	1	1	1	0	1	1
40	0	1	1	2	0	0	0	0	0	0	0	0	1	1	1		1	1	1	0	1	0	0	0	1	1	0	0
24	1	1	1	2	0	0	1	1	1	1	0	0	1	1	0	I feared	1	1	0	1	1	1	1	1	1	1	1	1
26	0	1	1	1	2	4	1	0	0	0	1	0	0	1	1		0	1	0	0	0	0	0	0	1	0	0	0
24	1	1	1	2	0	0	1	0	0	0	0	0	1	0	1		1	1	0	1	1	0	0	0	1	0	0	1
22	1	2	1	0	0	0	1	0	0	1	1	1	1	0			1	1	1	0	1	1	1	1	1	1	0	1
22	1	2	1	1	0	0	1	1	0	0	1	1	1	1	1		1	1	1	1	1	0	0	1	0	1	0	1
23	1	1	1	1	0	2	1	1	1	1	0	1	1	1	1		1	1	1	1	1	1	0	1	1	1	1	1
23	1	1	0	0	0	3	0	0	1	0	0	0	0	1	1		0	1	0	1		0	1	1	1	1	1	1
22	1	1	1	1	0	0	0	0	0	0	0	1	1	1	1		1	1	1	0	1	1	0	1	1	0	1	1
22	1	1	1	1	0	2	1	0	0	0	1	1	0	1	0	I was unable to access the vaccine	1	1	1	1	0	0	0	1	1	1	0	0
22	0	1	1	0	0	0	1	1	0	0	0	1	1	1	1		1	1	1	1	1	0	0	1	1	1	0	1
23	1	1	2	0	0	0	0	1	0	1	0	0		1	0	I was unable to access the vaccine		1	1	0	0	1	0	1	0	0	0	0
30	1	1	1	2	0	2	1	1	1	1	1	1	1	1	1	I did not want the vaccine	1	1	1	1	1	1	1	1	1	1	1	1
24	1	1	1	0	0	1	0	1	1	1	0	0	0	1	1		1	1	0	1	1	1	0	1	1	0	0	1
26	1	1	1	0	0	2	1	1	1	1	0	1	1	1	1		0	1	1	0	1	1	1	1	1	1	1	1
26	1	1	1	1	0	3	1	1	1	1	0	0	1	0	0	I did not want the vaccine	1	1	1	1	1	1	1	1	1	1	1	1
22	1	1	1	2	0	2	1	1	0	0	0	1	0	1	1		1	1	1	1	0	0	0	0	0	0	0	0
32	1	1	1	1	2	5	1	1	1	1	1	1	1	1	1		1	1	1	0	1	1	1	1	0	1	0	1
34	1	1	1	1	2	5	0	0	0	0	0	0	0	0	0	I did not want the vaccine	0	1	0	1	0	1	0	0	1	0	0	0
37	1	1	1	1	2	5	1	1	1	0	0	1	1	1	1		1	1	1	1	1	1	0	1	1	1	1	1
34	1	1	1	1	2	5	1	0	0	0	0	0	0	0	1		1	1	1	0	1	0	0	1	1	0	0	0
23	1	1	1	1	0	1	1	1	1	1	1	1	0	1	1		1	1	1	1	1	1	1	1	1	1	1	1
27	1	1	1	1	0	1	1	1	1	1	0	0	0	1	1		1	1	1	1	1	1	0	1	1	1	1	1
20	1	1	0	1	0	1	1	1	1	1	0	0	1	1	1		1	1	1	1	1	1	1	1	1	1	1	1
22	1	1	1	0	0	5	1	0	1	0	1	1	1	1	1		1		1	1	1	1	1	1	1	1	1	1
23	0	1	2	1	0	1	0	1	1	1	0	0	1	0	1		0	1	1	1	1	1	1	0	0	0	0	0
23	0	1	1	0	0	1	1	1	1	0	0	0	0	1	0	I feared	0	1	1	0	0	0	0	0	1	1	0	0
24	0	1	1	0	0	3	0	1	0	0	1	0	1	0	1		1	1	0	1	0	0	0	1	1	1	1	1
39	1	1	0	1	0	4	1	0	0	1	1	1	1	1	0	I did not want the vaccine	1	1	1	1	1	0	0	1	1	1	1	1
20	1	1	1	0	0	3	1	1	1	1	1	1	1	1	1		1	1	1	1	1	1	1	1	1	1	1	1
24	1	1	1	0	0	1	0	0	0	0	0	0	0	0	0	I feared	0	1	1	0	0	0	0	0	0	0	0	0
22	1	1	1	1	0	6	1	1	1	1	1	1	1	1	1		1	1	1	1	1	1	1	1	1	1	1	1
24	1	1	1	0	0	3	0	1	1	1	0	0	1	1	0	I feared	1	1	1	0	1	1	0	1	1	1	0	1
30	1	1	1	1	0	6	1	1	1	1	0	1	0	1	1		1	1	1	1	1	1	1	1	1	1	1	1
25	1	1	1	0	0	3	1	1	1	1	1	1	0	1	0	I did not want the vaccine	1	1	1	0	1	1	0	0	1	1	0	0
22	1	1	0	1	0	6	1	1	0	1	0	0	0	1	1		0	1	1	1	0	0	0	1	0	1	0	1
23	1	1	1	1	0	6	1	1	0	1	1	1	1	1	1		1	1	1	1	1	0	1	1	1	1	1	1
24	1	1	1	0	0	1	0	0	0	0	1	0	0	0	1		0	1	1	1	0	0	0	0	0	0	0	0
22	1	1	1	1	0	6	1	1	1	1	1	1	1	1	1		1	1	1	1	1	1	1	1	1	1	1	1
23	0	2	0	1	0	6	0	1	0	0	0	0	0	0	1		1	1	1	0	1	0	0	0	0	1	1	0
21	1	1	1	1	0	6	1	1	1	1	0	0	1	1	1		1	1	0	1	1	1	0	1	0	1	1	0
19	0	1	0	1	0	6	1	1	0	0	0	0	0	1	0	I feared	0	1	1	1	0	1	0		0	1	0	0
23	1	1	1	1	0	6	1	1	1	1	1	0	1	1	1	I did not want the vaccine	1	1	1	1	1	1	1	1	1	1	1	1
22	0	1	1	1	0	6	1	1	1	1	1	1	1	1	1		1	1	1	1	1	1	0	1	1	1	1	1
23	1	1	1	1	0	6	1	1	1	1	1	1	1	1	1		1	1	1	1	0	1	0	1	1	1	0	0
22	0	1	0	1	0	6	1	1	1	1	0	1	1	1	1	My family/ friends discouraged me	0	1	1	0	0	1	0	0	0	1	0	1
22	0	1	1	1	0	6	0	1	1	1	0	1	1	1	0	I feared	1	1	1	0	1	1	1	1	0	1	0	1
23	0	1	1	1	0	6	0	1	1	1	1	1	1	1	1		0	1	0	1	1	1	0	1	1	1	0	1
21	0	1	1	1	0	6	1	1	1	1	0	1	1	1	1		1	1	1	1	1	1	1	1	1	1	1	1
25	1	1	1	1	0	3	1	1	0	1	0	0	1	1	1	I feared	1	1	1	1	1	1	1	0	1	1	1	1
21	0	1	2	1	0	3	0	1	0	0	0	0	0	1	1		0	0	1	1	1	1	0	1	1	1	1	1
21	0	1	0	1	0	3	0	0	0	1	1	1	1	1	1	I feared		1	1	1	1	1	1	0	1	1	1	1
25	1	1	1	0	0	3	1	1	0	0	1	0	1	1	1		0	1	1	0	0	0	0	0	1	1	0	1
21	1	1	1	0	0	3	0	1	1	1	0	0	1	1	1		1	1	1	0	1	1	0	0	1	1	1	1
26	1	1	1	0	0	5	0	0	0	0	0	0	0	1	1		1	1	1	1	0	1	1	1	1	1	0	1
23	0	1	1	0	0	3	0	1	1	1	0	1	1	1	1		1	1	1	1	1	0	0	1	1	1	0	1
22	1	1	0	0	0	3	0	1	0	0	0	0	0	1	1	I did not want the vaccine	1	1	1	1	1	0	.	0				0
21	1	1	1	1	0	1	0	1	1	1	0	0	0	0	0	My family/ friends discouraged me	1	1	1	1	1	1	0	1	1	1	1	1
23	1	1	1	1	0	1	1	1	1	1	1	0	1	1	1		1	1	1	1	1	1	1	1	1	1	1	1
24	1	1	1	1	0	1	0	0	0	0	0	0	0	0	1		1	1	1	0	1	0	0	0	1	1	0	0
23	1	1	1	1	0	1	0	1	1	1	1	1	1	1	1		1	1	1	0	1	1	1	1	1	0	1	1
22	1	1	1	1	0	1	0	1	1	1	1	0	1	1	1		1	1	1	1	1	1	0	1	1	1	0	0
24	0	1	1	1	0	1	1	1	1	1	1	1	1	1	1		1	1	1	1	1	1	1	1	1	1	1	1
24	1	1	1	1	0	1	0	1	1	1	0	0	1	1	1		1	1	1	1	1	1	1	1	1	1	1	1
24	0	1	1	0	0	1	1	1	1	1	1	1	0	1	1		1	1	1	0	1	1	1	1	1	1	1	1
23	0	2	1		0	1	0	1	1	1	1	1	1	1	1		1	1	1	0	1	1	1	1	1	1	1	1
21	0	1	1	0	0	1	1	1	1	1	0	1	1	1	1		1	0	1	1	1	1	1	1	0	1	1	1
20	1	1	1	0	0	1	0	1	1	1	0	1	0	1	1		0	1	1	1	1	1	1	0	1	0	0	1
23	1	1	1	0	0	6	1	1	1	1	0	1	1	1	0	I was unable to access the vaccine	1	1	1	1	1	1	1	1	1	1	0	1
22	1	1	0	0	0	5	0	1	1	0	1	1	0	1	1		1	1	1	0	1	1	0	1	1	1	1	0
23	0	2	1	0	0	5	1	1	0	0	1	1	1	1	1		1	1	1	1	1	1	0	1	0	0	1	1
21	0	1	1	0	0	5	0	1	1	1	1	0	0	1	1		1	1	1	1	1	1	1	1	1	1	1	1
23	1	1	1	0	0	1	1	1	1	0	1	0	1	1	1		1	1	1	0	0	1	0	1	1	0	1	1
25	0	1	1	0	0	5	1	1	1	1	1	0	0	0	1		1	0	1	1	1	1	0	1	1	1	0	1
31	1	1	1	0	0	1	0	1	1	1	0	0	0	1	0	My family/ friends discouraged me	1	1	1	1	1	1	1	1	1	1	1	1
23	1	1	1	0	0	3	1	1	1	1	1	0	0	1	0	I feared		1	1	1	1	1	1	0	0	0	0	1
45	1	1	1	0	2	6	0	1	1	1	0	1	1	1	0	I did not want the vaccine	0	1	1	1	1	1	0	1	0	1	1	1
22	0	1	1	0	0	6	0	1	0	0	0	0	0	0	1		1	1	1	1	1	0	0	1	1	1	0	0
23	0	1	1	0	0	5	1	1	1	1	1	0	0	1	1		1	1	1	0	1	1	1	1	1	1	1	0
22	1	1	1	0	0	0	1	1	1	0	0	1	1	0	0	I feared	1	1	1	0	1	1	0	1	0	1	1	1
22	1	1	1	0	0	3	0	1	1	1	0	1	1	0	1		1	1	1	0	1	1	0	1	1	1	1	1
32	1	1	1	2	1	6	1	1	1	1	1	1	1	1	0	I was unable to access the vaccine	1	0	1	1	1	1	0	1	0	1	1	1
23	1	3	1	2	0	2	0	0	0	0	0	0		1	1		1	0	1	1		0	0	0	1	1	0	0
27	0	2	0	0	0	6	0	0	0	0	0	0	0	1	0	I did not want the vaccine	1	0	0	0	1	0	0	0	1	0	0	0
24	1	2	1	1	0	0	0	1	0	1	0	1	1	1	0	My family/ friends discouraged me	1	1	1	1	1	1	0	1	1	1	1	1
22	0	1	1	1	0	1		1	1	1	1	1	1	1	1		1	0	1	1	1	1	1	1	1	1	0	1
29	1	0	1	1	1	2	0	0	0	0	0	0		1	0	My family/ friends discouraged me	1	0	1	1	0	0	0	0	1	1	0	0
23	0	2	0	2	0	2	1	0	0	0	0	0	0	0	0	My family/ friends discouraged me	0	1	1	1	0	0	0	0	0	0	0	0
25	1	0	1	2	0	2	1	0	0	0	0	0	0	0	0	My family/ friends discouraged me	0	1	1	0	0	0	0	0	0	0	0	0
25	1	1	1	0	0	2	0	0	0	0	0	0	0	0	0	I did not want the vaccine	0	0	1	0	0	0	0	0	0	0	0	0
26	1	1	1	1	0	2	0	0	0	0	0	0	0	0	0	I feared	0	1	1	0	0	0	0	0	1	1	0	0
30	0	1	1	0	0	2	1	0	0	0	0	0	0	0	0	My family/ friends discouraged me	0	1	1	0	0	0	0	0	0	0	0	0
35	1	1	0	2	0	2	0	0	0	0	0	0	0	0	0	I feared	0	1	1	0	0	0	0	0	0	0	0	0
25	1	1	1	1	0	2	0	0	0	0	0	0	0	0	0	I feared	0	1	1	0	0	0	0	0	0	0	0	0
23	1	1	1	1	0	2	0	0	0	0	0	0	0	0	0	I feared	0	1	1	0	0	0	0	1	0	0	0	0
23	1	1	1	0	0	2	1	0	0	0	0	0	0	0	0	I feared	0	1	1	0	0	0	0	0	0	0	0	0
24	0	1	1	1	0	2	1	0	0	0	0	0	0	1	0	I did not want the vaccine	0	1	1	0	0	0	0	0	0	0	0	0
25	1	1	1	0	0	2	0	0	0	0	0	0	0	0	0	I did not want the vaccine	0	1	1	0	0	0	0	0	0	0	0	0
24	1	1	1	1	0	2	0	0	0	0	0	0	0	0	0	I was unable to access the vaccine	0	1	1	0	0	1	0	0	0	0	0	0
24	1	0	1	0	0	2	0	0	0	0	0	0	0	0	0	My family/ friends discouraged me	0	1	1	0	0	0	0	0	0	0	0	1
25	1	1	1	1	0	2	0	0	0	0	0	0	0	0	0	I did not want the vaccine	0	1	1	0	0	0	0	0	0	0	0	0
25	0	1	1	0	0	6	1	1	0	1	0	0	0	1	0	I feared	0	1	1	0	0	0	0	0	0	0	0	0
25	1	1	1	0	0	6	1	1	1	1	1	1	1	1	1		1	1	1	0	0	0	0	0	0	0	0	0
24	1	2	1	0	0	6	1	1	1	1	1	1	1	1	0		0	1	1	0	0	1	0	0	0	0	0	0
30	0	1	1	0	0	3	1	1	0	0	0	0	0	0	0	I was unable to access the vaccine	0	1	1	0	0	0	0	0	0	0	0	0
30	1	1	1	2	0	3	1	0	0	0	0	0	0	0	0	I did not want the vaccine	0	1	1	0	0	0	0	0	0	0	0	0
33	0	2	1	2	0	3	1	1	1	1	1	1	1	1	1		1	1	1	1	1	1	1	1	1	1	1	1
25	1	2	1	0	0	3	1	1	1	1	1	1	1	1	1		1	1	1	1	1	1	1	1	1	1	1	1
24	0	1	1	1	0	3	1	1	1	1	1	1	1	1	1		1	1	1	0	1	1	1	1	1	1	1	1
25	1	1	1	1	0	5	1	1	1	1	1	1	1	1	1		1	1	1	1	1	1	1	1	1	1	1	1
25	0	2	1	0	0	5	1	1	1	1	1	1	1	1	1		1	1	1	1	1	1	1	1	1	1	1	1
26	1	1	1	0	0	6	1	1	1	1	1	1	1	1	1		1	1	1	1	1	1	1	1	1	1	1	1
27	1	1	1	0	0	6	1	1	1	1	1	1	1	1	1		1	1	1	1	1	1	1	1	1	1	1	1
30	1	2	1	2	0	5	1	0	0	0	1	0	0	0	0	I feared	0	1	1	0	0	0	0	0	0	0	0	0
30	1	1	1	0	0	5	1	1	1	1	1	1	1	1	1		1	1	1	1	1	1	1	1	1	1	1	1
26	1	2	1	0	1	5	1	1	1	1	1	1	1	1	1		1	1	1	1	1	1	1	1	1	1	1	1
30	1	1	1	0	1	5	1	1	1	1	1	1	1	1	1		1	1	1	0	1	1	1	1	0	0	0	1
25	0	1	1	0	1	5	1	1	1	1	1	1	1	1	0	I feared	0	1	1	1	0	1	0	0	0	0	0	1
23	1	1	1	1	1	5	1	1	1	1	1	1	1	1	1		1	1	1	1	1	1	1	1	1	1	1	1
24	0	2	1	1	1	5	1	1	1	1	1	1	1	1	0	My family/ friends discouraged me	1	1	1	1	1	1	1	1	1	1	1	1
26	1	1	1	1	1	5	1	1	1	1	1	1	1	1	0	I feared	1	1	1	1	1	1	1	1	1	1	1	1
23	1	1	1	1	1	6	1	1	1	1	1	1	1	1	0	I feared	1	1	1	1	1	1	1	1	1	1	1	1
30	1	1	1	0	1	6	1	1	1	1	1	1	1	1	0	I was unable to access the vaccine	1	1	1	1	1	1	1	1	1	1	1	1
26	1	2	1	1	1	6	1	1	1	1	1	1	1	1	0	My family/ friends discouraged me	0	1	1	0	0	0	0	0	0	0	0	0
25	1	2	1	0	1	6	1	1	1	1	1	1	1	1	0	I feared	0	1	1	0	0	0	0	0	0	0	0	0
25	1	2	1	0	1	6	1	1	1	1	1	1	1	1	0	I feared	1	1	1	0	0	0	0	0	0	0	0	0
25	1	1	1	1	1	6	1	1	1	1	1	1	1	1	0	I was unable to access the vaccine	1	1	1	1	1	1	0	0	0	0	0	0
25	1	2	1	1	1	6	1	1	1	1	1	1	1	1	0	I feared	0	1	1	0	0	0	0	0	0	0	0	0
28	1	2	1	0	1	6	1	1	1	1	1	1	1	1	0	My family/ friends discouraged me	1	1	1	1	1	1	1	1	1	1	1	1
24	0	2	1	1	1	6	1	1	1	1	1	1	1	1	0	I feared	1	1	1	1	1	1	1	1	1	1
35	1	2	1	2	0	4	1	1	1	1	1	1	1	1	1		1	1	1	1	1	1	1	1	1	1	1	1
25	1	1	1	1	0	4	1	1	1	1	1	1	1	1	1		1	1	1	1	1	1	1	1	1	1	1	1
25	1	2	1	1	0	4	1	1	1	1	1	1	1	1	1		1	1	1	1	1	1	1	1	1	1	1	1
25	1	2	1	1	0	4	1	1	1	1	1	1	1	1	1		1	1	1	1	1	1	1	1	1	1	1	1
25	0	2	1	1	0	4	1	1	1	1	1	1	1	1	1		1	1	1	1	1	1	1	1	1	1	1	1
26	1	1	1	0	0	4	1	1	1	1	1	1	1	1	1		1	1	1	1	1	1	1	1	1	1	1	1
45	1	1	1	0	0	4	1	1	1	1	1	1	1	1	1		1	1	1	1	1	1	1	1	1	1	1	1
35	0	2	1	0	0	4	1	0	0	0	0	0	0	0	0	My family/ friends discouraged me	0	1	1	0	0	0	0	0	0	0	0	0
26	1	1	1	0	0	4	1	1	1	1	1	1	1	1	0	I did not want the vaccine	1	1	1	1	1	1	1	1	1	1	0	0
36	0	2	1	1	0	0	1	1	0	1	1	1	1	1	1		1	1	1	1	1	1	1	1	1	1	1	0
22	1	1	1	0	0	3	0	1	0	1	0	1	1	1	1		1	1	1	1	1	0	0	1	1	0	0	1
26	1	2	1	0	0	2	1	0	0	0	0	0	0	0	0	I feared	0	1	1	0	0	0	0	0	0	0	0	0
26	1	1	1	0	0	2	1	0	0	0	0	0	0	0	0	I feared	0	1	1	0	0	0	0	0	0	0	0	0
24	1	1	1	2	0	5	0	0	0	0	0	1	1	0	1		1	1	1	1	1	1	1	1	1	1	0	0
27	1	2	0	2	0	2	1	0	0	0	0	0	0	0	0	My family/ friends discouraged me	0	1	1	0	0	0	0	0	0	0	0	0
23	1	1	1	0	0	2	0	1	0	0	0	0	0	1	1		1	1	1	1	1	0	0	1	1	0	0	0
28	1	1	0	0	0	2	0	0	0	0	0	0	0	0	0	I feared	0	1	1	0	0	0	0	0	0	0	0	0
30	1	1	1	0	0	2	0	0	0	0	0	0	0	0	0	I feared	0	1	1	0	0	0	0	0	0	0	0	0
35	0	1	1	0	0	6	1	1	0	0	0	0	0	0	1		1	0	0	0	0	0	0	1	1	0	0	0
25	0	1	1	0	0	5	1	1	0	0	0	0	0	1	1		0	1	1	1	1	0	0	1	1	1	1	1
34	0	2	0	0	0	2	0	0	0	0	0	0	0	0	0	I feared	0	1	1	0	0	0	0	0	0	0	0	0
30	0	1	1	2	0	0	1	0	0	0	0	0	1	0	0	I feared	1	1	1	1	1	0	0	1	1	1	1	1
28	1	1	0	0	0	2	0	0	0	0	0	0	0	0	0	I feared	0	1	1	0	0	0	0	0	0	0	0	0
35	1	1	1	2	0	0	1	1	0	0	0	1	0	1	1		1	1	1	0	1	0	1	1	1	0	0	1
29	0	1	1	2	0	0	1	1	0	1	1	1	1	0	1		0	1	1	0	1	0	0	1	1	1	1	1
26	1	1	1	0	0	2	0	0	0	0	0	0	0	0	0	I feared	0	1	1	0	0	0	0	0	0	0	0	0
26	1	1	1	2	0	2	1	0	0	0	0	0	0	0	0	I feared	0	1	1	0	0	0	0	0	0	0	0	0
30	0	2	1	0	0	2	1	0	0	0	0	0	0	0	0	I feared	0	1	1	0	0	0	0	0	0	0	0	0
26	1	1	1	0	0	4	1	0	0	0	0	0	0	0	0	I feared	0	1	1	0	0	0	0	0	0	0	0	0
30	1	2	1	0	0	4	0	0	0	0	0	0	0	0	0	I feared	0	1	1	0	0	0	0	0	0	0	0	0
30	0	2	1	2	0	4	1	0	0	0	0	0	0	0	0	My family/ friends discouraged me	0	1	1	0	0	0	0	0	0	0	0	0
28	1	1	1	0	0	4	1	0	0	0	0	0	0	0	0	My family/ friends discouraged me	0	1	1	0	0	0	0	0	0	0	0	0
24	1	2		0	0	5	1	1	1	1	1	1	1		1		1	1	1	1	1	0	1	1	1	1	1	1
30	1	1	1	2	0	4	1	0	0	0	0	0	0	0	0	I feared	0	1	1	0	0	0	0	0	0	0	0	0
30	1	1	0	0	1	3	0	0	0	0	0	0	0	0	0	My family/ friends discouraged me	0	1	1	0	0	0	0	0	0	0	0	0
40	1	1	0	0	1	3	0	0	0	0	0	0	0	0	0	My family/ friends discouraged me	0	1	1	0	0	0	0	0	0	0	0	0
30	1	1	1	0	1	3	0	0	0	0	0	0	0	0	0	My family/ friends discouraged me	0	1	1	0	0	0	0	0	0	0	0	0
26	0	1	0	0	1	3	1	0	0	0	0	0	0	0	0	My family/ friends discouraged me	0	1	1	0	0	0	0	0	0	0	0	0
30	1	2	1	0	0	4	0	0	0	0	0	0	0	0	0	I did not want the vaccine	0	1	1	0	0	0	0	0	0	0	0	0
34	1	1	0	0	0	2	1	0	0	0	0	0	0	0	0	I did not want the vaccine	0	1	1	0	0	0	0	0	0	0	0	0
34	1	1	0	0	0	2	1	0	0	0	0	0	0	0	0	My family/ friends discouraged me	0	1	1	0	0	0	0	0	0	0	0	0
25	1	2	0	0	0	4	1	0	0	0	0	0	0	0	0	My family/ friends discouraged me	0	1	1	0	0	0	0	0	0	0	0	0
30	0	1	0	1	0	4	1	0	0	0	0	0	0	0	0	My family/ friends discouraged me	0	1	1	0	0	0	0	0	0	0	0	0
40	1	1	1	2	0	2	1	0	0	0	0	0	0	0	0	I did not want the vaccine	0	1	1	0	0	0	0	0	0	0	0	0
25	1	1	0	0	0	4	1	0	0	0	0	0	0	0	0	I feared	0	1	1	0	0	0	0	0	0	0	0	0
22	1	2	1	1	0	5	0	1	0	0	0	0	1	1	1		1	1	1	1	1	1	0	1	1	0	0	0
34	1	1	1	2	0	2	1	0	0	0	0	0	0	0	0	I did not want the vaccine	0	1	1	0	0	0	0	0	0	0	0	0
30	0	1	1	0	0	2	1	0	0	0	0	0	0	0	0	I did not want the vaccine	0	1	1	0	0	0	0	0	0	0	0	0
34	0	1	0	0	0	4	1	0	0	0	0	0	0	0	0	I did not want the vaccine	0	1	1	0	0	0	0	0	0	0	0	0
26	0	1	1	0	0	2	1	0	0	0	0	0	0	0	0	My family/ friends discouraged me	0	1	1	0	0	0	0	0	0	0	0	0
27	0	1	0	0	0	3	1	0	0	0	0	0	0	0	0	I feared	0	1	1	0	0	0	0	0	0	0	0	0
27	1	1	0	0	0	3	1	0	0	0	0	0	0	0	0	I did not want the vaccine	0	1	1	0	0	0	0	0	0	0	0	0
28	1	1	0	0	0	3	1	0	0	0	0	0	0	0	0	I did not want the vaccine	0	1	1	0	0	0	0	0	0	0	0	0
30	0	1	0	0	1	3	1	0	0	0	0	0	0	0	0	I did not want the vaccine	0	1	1	0	0	0	0	0	0	0	0	0
30	1	1	1	0	0	6	1	0	0	0	0	0	0	0	0	I did not want the vaccine	0	1	1	0	0	0	0	0	0	0	0	0
34	0	2	1	0	0	6	1	0	0	0	0	0	0	0	0	My family/ friends discouraged me	0	1	1	0	0	0	0	0	0	0	0	0
30	0	1	1	0	0	4	1	0	0	0	0	0	0	0	0	My family/ friends discouraged me	0	1	1	0	0	0	0	0	0	0	0	0
27	1	1	0	1	2	4	1	0	0	0	0	0	0	0	0	I feared	0	1	1	0	0	0	0	0	0	0	0	0
30	1	2	0	2	0	4	1	0	0	0	0	0	0	0	0	My family/ friends discouraged me	0	1	1	0	0	0	0	0	0	0	0	0
27	1	2	0	2	1	3	1	0	0	0	0	0	0	0	0	I did not want the vaccine	0	1	1	0	0	0	0	0	0	0	0	0
24	1	2	0	0	0	4	1	0	0	0	0	0	0	0	0	I feared	0	1	1	0	0	0	0	0	0	0	0	0
30	0	1	0	0	0	4	1	0	0	0	0	0	0	0	0	My family/ friends discouraged me	0	1	0	0	0	0	0	0	1	0	0	0
37	1	2	1	2	0	2	1	0	0	0	0	0	0	0	0	My family/ friends discouraged me	0	1	1	0	0	0	0	0	0	0	0	0
34	1	2	0	2	0	4	1	0	0	0	0	0	0	0	0	I did not want the vaccine	0	1	1	0	0	0	0	0	0	0	0	0

## Sheet: codebook
code book
Q1	what is your age (in years)?
Q2	sex
Q3	what is your religion
Q4	How do you rate your overall health status?
Q5	Year of study
Q6	Name of Program of study (eg. Bachelor of Laws)
Q7	Level of Program of study
Q8	What is your field of study?
Q9	Have you heard about any recent clinical research testing the effectiveness of a vaccine?
Q10	Do you think that volunteering to participate in a research study testing a new vaccine is important?
Q11	In the event of a disease outbreak (e.g., COVID-19, Ebola, or Marburg, etc), would you consider volunteering to participate in a research study testing a new vaccine for that disease? This would involve regular health check-ups and receiving the new
Q12	Do you think it is safe to volunteer to participate in a research study testing a new vaccine or drug?
Q13	Have you or your close relative ever participated in any clinical/medical research related to vaccines as a research subject?
Q14	Do you trust that vaccine and drug manufacturers take adequate steps to ensure that their products (vaccines & drugs) are safe before they are made available to the public?
Q15	Do you trust that Health workers and research scientists would protect you or give you all the information if you decided to participate in research testing a new vaccine or drug?
Q16	Do you feel that receiving direct personal benefits (e.g., improved health or protection against a disease) is necessary for you to participate in a research study?
Q17	Did you receive any type of vaccine in the recent epidemics or pandemics? eg covid19 or Ebola vaccines
Q18	If no in 17, why?
Q19	I am aware of the benefits of vaccines
Q20	I understand there are risks associated with vaccines
Q21	My family supports vaccination
Q22	I get most of my information about vaccines from social media
Q23	I believe that participating in vaccine trials is important for advancing medical research
Q24	I am willing to participate in vaccine trials if I am provided with sufficient information about the trial
Q25	I would participate in a vaccine trial if I received compensation for my time and involvement
Q26	I believe that my participation in a vaccine trial could help others in the community
Q27	I am concerned about the potential side effects of participating in a vaccine trial
Q28	I would be more willing to participate in a vaccine trial if I knew someone who had participated in one before
Q29	I trust the safety measures that are in place for vaccine trials
Q30	I feel that my personal health and safety would be prioritized in a vaccine trial
	Responses
Q2	male
	female
Q3	christian
	muslim
	noreligious
	poor
Q4	fair
	good
	excellent
Q5	i
	ii
	iii
	iv
Q6
Q7	diploma
	bachelor's degree
	postgraduate
